# Supplementary material
Source: PubMed Central journal article supplement (PMC3190773)

## SUPPLEMENTARY FIGURES.

Supplemental Figure 1. Synthesis of [<sup>3</sup>H]-12-(S)-HETE. The HPLC elution profile of arachidonic acid (A), 12-(S)-HETE standards (B), or synthesized [<sup>3</sup>H]-12-(S)-HETE (C). The synthesized [<sup>3</sup>H]-12-(S)-HETE was collected in fractions eluted between 3.75-4.75 min (C).

Supplemental Figure 2. A. The mRNA level of *GPR31* expression is  $2.92 \pm 1.9$  fold higher in PC3 cells than that in the DU145 cells (\*,  $p < 0.05$ ). The specific binding of [<sup>3</sup>H]-12-(S)-HETE is  $6.8 \pm 2.9$  fold higher in PC3 cells than that in the DU145 cells (\*,  $p < 0.05$ ). B. Specific binding of [<sup>3</sup>H]-12-(S)-HETE in *GPR31*, *BLT2* and *pcDNA* vectors transfect CHO cells. Note that the specific binding of [<sup>3</sup>H]-12-(S)-HETE in *GPR31* expressing cells is markedly higher than that in BLT2 expressing cells.

Supplemental Figure 3. 12-(S)-HETE/GPR31 signaling is unable to induce intracellular  $\text{Ca}^{+2}$  mobilization. (A)  $\text{Ca}^{+2}$  mobilization was measured as we previously described (1). Note that various concentrations of 12-(S)-HETE was unable to stimulate intracellular  $\text{Ca}^{+2}$  mobilization in PC-3 cells. (B) Expression of GPR31 receptors in a panel of endothelial cells. (C) 12-(S)-HETE was unable to induce  $\text{Ca}^{+2}$  mobilization in HUVEC cells. In a control, sphingosine-1-phosphate (S1P) is able to induce  $\text{Ca}^{+2}$  mobilization in HUVEC. HUVEC, human umbilical vein endothelial cells; HBMEC, human brain microvascular endothelial cell, HPAC, human pulmonary aortic endothelial cells.

### Reference

1. Lee MJ, Thangada S, Claffey KP, Ancellin N, Liu CH, Kluk M, Volpi M, Sha'afi RI, Hla T (1999). Vascular endothelial cell adherens junction assembly and morphogenesis induced by sphingosine-1-phosphate. *Cell* 99: 301-312.

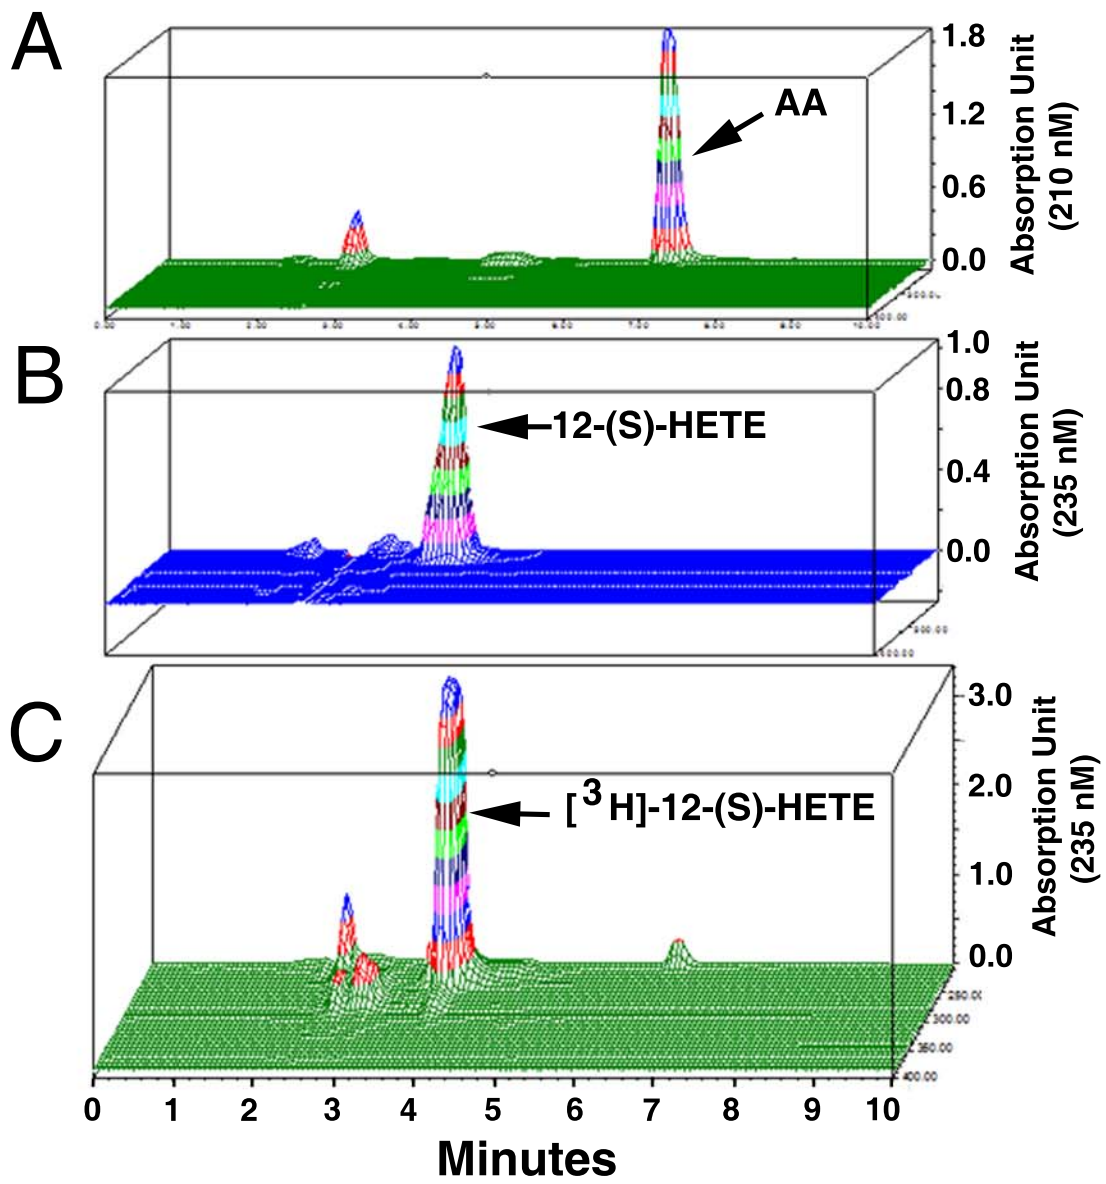

Guo et al., Suppl. Fig. 1

A

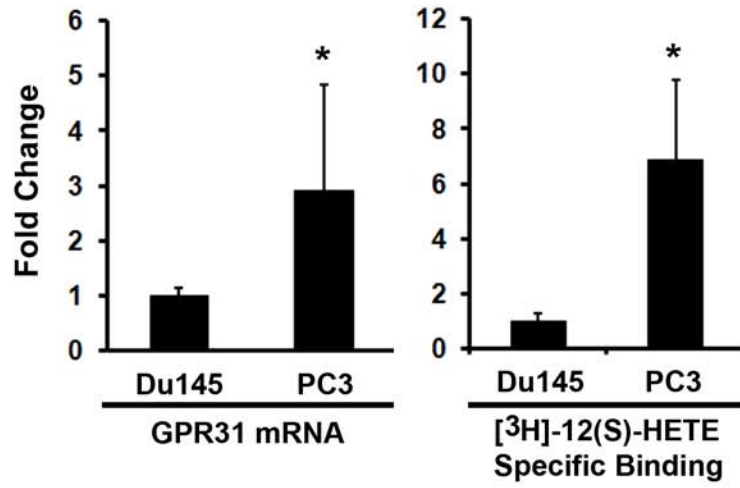

B

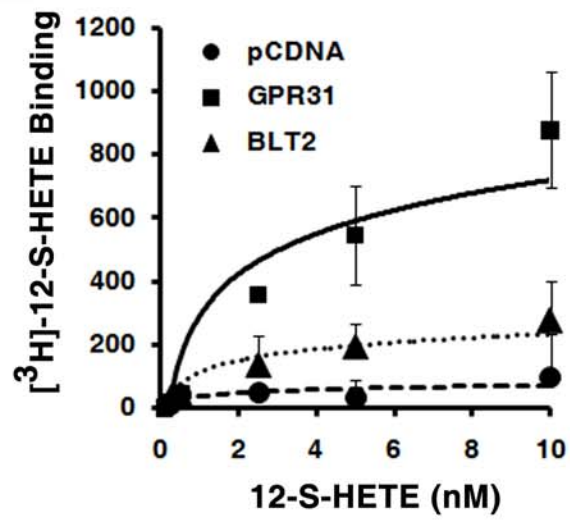

Guo et al., Suppl. Fig 2

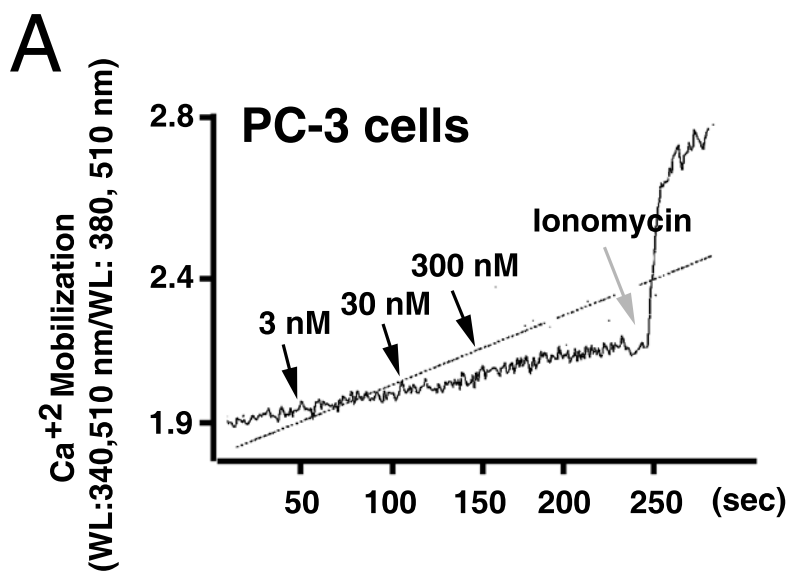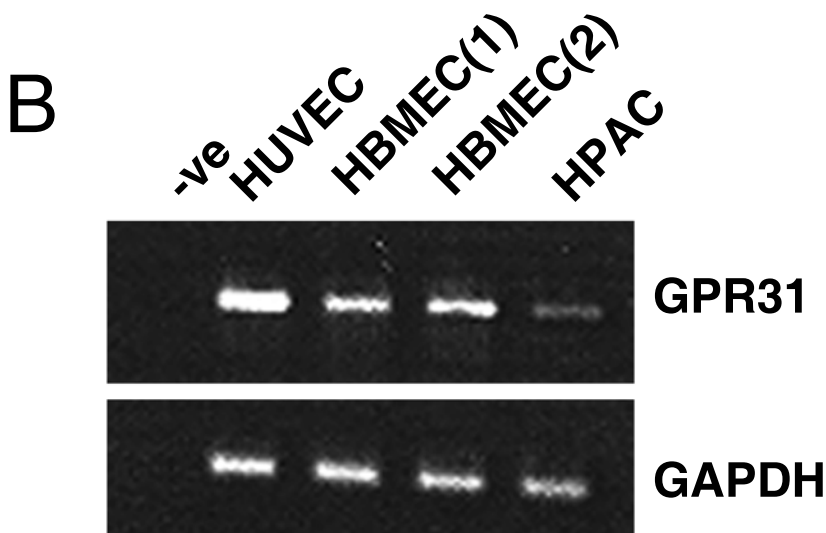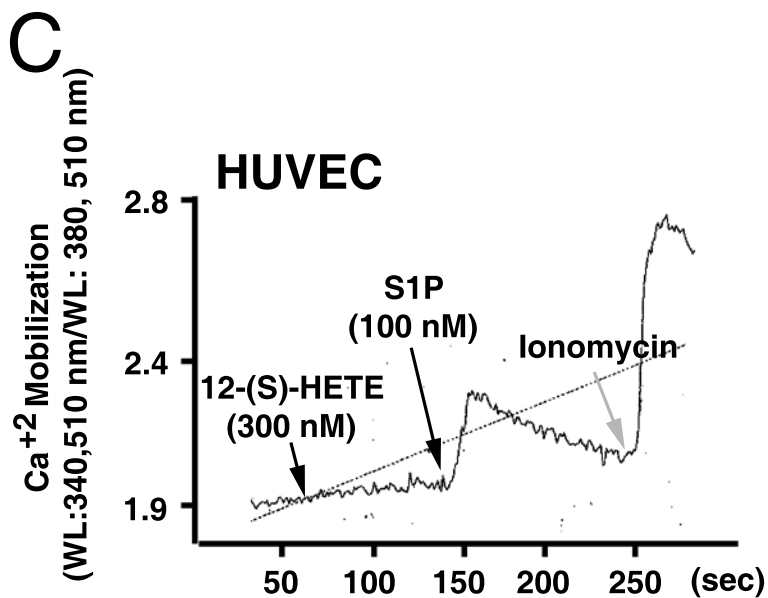

Supplement: supp_M110.216564_jbc.M110.216564-1.pdf [file supp_M110.216564_jbc.M110.216564-1.pdf]
